# Supplementary material
Source: Elsevier journal article supplement (https://www.sciencedirect.com/science/article/pii/S2253654X18301550)
Supplement: mmc1 [file S2253654X18301550:mmc1.docx]

**ANEXO I**

| **Actividad del Proceso: VALIDACIÓN** | | |
| --- | --- | --- |
| FALLO | CAUSA | EVENTO ADVERSO |
|  |  |  |
|  |  |  |
|  |  |  |
|  |  |  |
|  |  |  |
|  |  |  |
|  |  |  |
|  |  |  |
