# Supplementary material
Source: Elsevier journal article supplement (https://www.sciencedirect.com/science/article/pii/S2253654X18301550)
Supplement: mmc6 [file S2253654X18301550:mmc6.docx]

**ANEXO VI**

**RELACIÓN DE LOS FALLOS DESCRITOS ORDENADOS SEGÚN SU IPR**

| **Nº DE**  **PROCESO** | **FALLO** | **IPR** | **CRÍTICO** |
| --- | --- | --- | --- |
| 2 | Pérdida de la petición | 192 | X |
| 11 | No revisar la historia del paciente | 168 | X |
| 5 | No realizar test de embarazo a mujeres fértiles | 90 | X |
| 7 | Seleccionar mal al paciente de la lista de trabajo | 72 | X |
| 2 | Demora en la citación | 56 |  |
| 1 | No priorización | 50 |  |
| 3 | Error en la identificación del paciente | 48 |  |
| 3 | Falta identificación de la patología | 40 |  |
| 2 | Error en la identificación del paciente | 32 | X |
| 4 | Paciente hiperglucémico | 32 | X |
| 4 | Sueroterapia inadecuada | 32 | X |
| 7 | No revisar las imágenes adquiridas al finalizar | 32 | X |
| 9 | Tubo de rayos X mal calibrado | 32 | X |
| 5 | Error en la identificación del paciente | 24 | X |
| 6 | Extravasación del trazador | 24 | X |
| 10 | Ausencia de normalización de las imágenes | 24 | X |
| 10 | No revisar las imágenes en las tres dimensiones | 24 | X |
| 10 | No revisar todas las imágenes | 24 | X |
| 1 | No información clínica | 20 |  |
| 5 | Historia de enfermería incompleta o ausente | 20 |  |
| 6 | Retraso en la inyección | 18 |  |
| 8 | No disponibilidad del RF | 18 |  |
| 1 | Error en la identificación del paciente | 16 | X |
| 3 | Dosis inadecuada | 16 | X |
| 10 | Error en la identificación del paciente | 16 | X |
| 11 | Informar sobre las imágenes de otro paciente | 16 | X |
| 7 | Adquisición errónea del estudio | 15 |  |
| 12 | Retraso en despedir al paciente | 12 |  |
| 13 | Falta de información de las medidas de protección radiológica | 10 |  |
| 5 | Administración inadecuada de insulina | 9 | X |
| 5 | No mantener la vía cuando se administra insulina | 9 | X |
| 5 | Demora en la atención | 9 |  |
| 3 | Radiofármaco incorrecto | 8 |  |
| 4 | Paciente con QT o RT reciente | 8 | X |
| 4 | Falta ayuno | 8 | X |
| 5 | No explicación de la exploración | 8 |  |
| 5 | Falta amabilidad | 8 |  |
| 5 | No medida de la glucemia | 8 | X |
| 6 | Pérdida de dosis | 8 | X |
| 6 | Administración errónea del RF | 8 | X |
| 8 | Dosis de RF incorrecta | 8 |  |
| 1 | No aparición del paciente | 6 |  |
| 1 | Error en la prestación | 6 |  |
| 2 | Falta de datos del paciente | 6 |  |
| 6 | Contaminación del paciente | 6 |  |
| 7 | Elección errónea del protocolo de adquisición | 6 |  |
| 8 | Retraso en la dispensación del RF a enfermería | 6 |  |
| 9 | Fuente de calibración caducada | 6 |  |
| 8 | Dispensación errónea del RF | 5 | X |
| 9 | Aumento del número de averías | 5 |  |
| 12 | No facilitar un sitio adecuado para vestirse | 5 |  |
| 2 | Citado para una exploración errónea | 4 |  |
| 2 | Petición anulada sin aviso | 4 |  |
| 4 | Hiperactividad muscular | 4 |  |
| 11 | No visualización del informe en el programa | 4 |  |
| 5 | Dificultad en la canalización vía | 3 |  |
| 11 | Retraso en la elaboración del informe | 3 |  |
| 12 | Olvido de efectos personales del paciente en la sala | 3 |  |
| 10 | Las imágenes no han llegado a las estaciones de proceso y PACs | 2 |  |
| 3 | Paciente mal ubicado en la sala | 1 |  |
| 3 | No prescripción | 1 |  |
| 4 | Retraso o no llegada del paciente (en ambulancia, de planta o casa) | 1 |  |
| 7 | No elección del paciente a través de la lista de trabajo | 1 |  |
