# Supplementary material
Source: Elsevier journal article supplement (https://www.sciencedirect.com/science/article/pii/S2253654X18301550)
Supplement: mmc7 [file S2253654X18301550:mmc7.docx]

**ANEXO VII**

**RELACIÓN DE FALLOS CONSIDERADOS CRÍTICOS**

| **Nº DE PROCESO** | **FALLO** | **IPR** | **CRÍTICO** |
| --- | --- | --- | --- |
| 2 | Pérdida de la petición | 192 | X |
| 11 | No revisar la historia del paciente | 168 | X |
| 5 | No realizar test de embarazo a mujeres fértiles | 90 | X |
| 7 | Seleccionar mal al paciente de la lista de trabajo | 72 | X |
| 2 | Error en la identificación del paciente | 32 | X |
| 4 | Paciente hiperglucémico | 32 | X |
| 4 | Sueroterapia inadecuada | 32 | X |
| 7 | No revisar las imágenes adquiridas al finalizar | 32 | X |
| 9 | Tubo de rayos X mal calibrado | 32 | X |
| 5 | Error en la identificación del paciente | 24 | X |
| 6 | Extravasación del trazador | 24 | X |
| 10 | Ausencia de normalización de las imágenes | 24 | X |
| 10 | No revisar las imágenes en las tres dimensiones | 24 | X |
| 10 | No revisar todas las imágenes | 24 | X |
| 1 | Error en la identificación del paciente | 16 | X |
| 3 | Dosis inadecuada | 16 | X |
| 10 | Error en la identificación del paciente | 16 | X |
| 11 | Informar sobre las imágenes de otro paciente | 16 | X |
| 5 | Administración inadecuada de insulina | 9 | X |
| 5 | No mantener la vía cuando se administra insulina | 9 | X |
| 4 | Paciente con QT o RT reciente | 8 | X |
| 4 | Falta ayuno | 8 | X |
| 5 | No medida de la glucemia | 8 | X |
| 6 | Pérdida de dosis | 8 | X |
| 6 | Administración errónea del RF | 8 | X |
| 8 | Dispensación errónea del RF | 5 | X |
